# Supplementary material for: Alleviation of cadmium-induced oxidative damage through application of zinc oxide nanoparticles and strigolactones in Solanum lycopersicum L.
Source: Royal Society of Chemistry journal article supplement (doi:10.1039/d3en00796k), 2024-01-01
Supplement: d3en00796k1.pdf [file d3en00796k1.pdf]

**Supporting information**

**Alleviation of Cadmium-Induced Oxidative Damage through Application of Zinc Oxide Nanoparticles and Strigolactones in *Solanum lycopersicum* L.**

Vaseem Raja<sup>a#</sup>, Karanpal Singh<sup>b#</sup>, Sami Ullah Qadir<sup>c</sup>, Jagpreet Singh<sup>d\*</sup>, Ki-Hyun Kim<sup>e\*</sup>

<sup>a</sup>*University Centre for Research and Development, Chandigarh University, Gharuan, Mohali (Punjab)-140413, India;*

<sup>b</sup>*Department of Electronics Engineering, Sri Guru Granth Sahib World University, Fatehgarh Sahib - 140406, Punjab, India;*

<sup>c</sup>*Department of Environmental Sciences, Government Degree Women's College Pulwama, 192301;*

<sup>d</sup>*Department of Chemistry, University Centre for Research and Development, Chandigarh University, Gharuan - Mohali-140413, Punjab, India;*

<sup>e</sup>*Department of Civil & Environmental Engineering, Hanyang University, 222 Wangsimni-Ro, Seoul 04763, Korea*

*\*Correspondence: jagpreetnano@gmail.com (JS); kkim61@hanyang.ac.k (KHK)*

**Table S1. Crystallographic parameters of synthesized ZnO NPs.**

| <b>S/N</b> | <b>2<math>\Theta</math>(degree)</b> | <b>FWHM<br/>(degree)</b> | <b>Lattice<br/>planes</b> | <b>Inter-planner<br/>spacing (d)</b> | <b>Crystallite size<br/>(D) nm</b> |
|------------|-------------------------------------|--------------------------|---------------------------|--------------------------------------|------------------------------------|
| 1.         | 31.81895                            | 0.50573                  | 100                       | 2.810101033                          | 16.33422                           |
| 2.         | 34.48523                            | 0.23702                  | 002                       | 2.598690899                          | 35.09459                           |
| 3.         | 36.30731                            | 0.44006                  | 101                       | 2.472346106                          | 18.9984                            |
| 4.         | 47.59853                            | 0.38707                  | 102                       | 1.908887087                          | 20.52417                           |
| 5.         | 56.60698                            | 0.6468                   | 110                       | 1.624619334                          | 12.28245                           |
| 6.         | 62.92766                            | 0.46564                  | 103                       | 1.475783016                          | 17.06101                           |
| 7.         | 66.45195                            | 0.50505                  | 200                       | 1.405804406                          | 15.72971                           |
| 8.         | 68.00271                            | 0.56582                  | 112                       | 1.377472762                          | 14.04031                           |
| 9.         | 69.19232                            | 0.67919                  | 201                       | 1.356666956                          | 11.69671                           |
|            |                                     |                          |                           |                                      | <b>D (average)=</b>                |
|            |                                     |                          |                           |                                      | <b>17.97</b>                       |

**Table S2. Calculations for the Williamson-Hall plot.**

| S/N | 2 $\Theta$ degrees | Theta<br>(radians) | FWHM<br>(degrees) | FWHM<br>(radians) | $\beta_{\tau}\text{Cos}\Theta$ | 4 Sin $\Theta$ |
|-----|--------------------|--------------------|-------------------|-------------------|--------------------------------|----------------|
| 1.  | 31.81895           | 0.277672721        | 0.57606           | 0.010054144       | 0.009669                       | 1.096473       |
| 2.  | 34.48523           | 0.300940403        | 0.33621           | 0.005867971       | 0.005604                       | 1.185674       |
| 3.  | 36.30731           | 0.316841051        | 0.53094           | 0.009266651       | 0.008805                       | 1.246266       |
| 4.  | 47.59853           | 0.415375534        | 0.67867           | 0.011845026       | 0.010838                       | 1.614134       |
| 5.  | 56.60698           | 0.49398909         | 0.6581            | 0.011486012       | 0.010113                       | 1.896567       |
| 6.  | 62.92766           | 0.549147429        | 0.7361            | 0.012847369       | 0.010958                       | 2.087841       |
| 7.  | 66.45195           | 0.579902661        | 1.01356           | 0.017689959       | 0.014798                       | 2.19177        |
| 8.  | 68.00271           | 0.593435595        | 0.7644            | 0.013341297       | 0.01106                        | 2.23685        |
| 9.  | 69.19232           | 0.603816901        | 0.74055           | 0.012925036       | 0.01064                        | 2.271154       |

**Table S3. Crystallite size of ZnO NPs by modifying Scherrer's equation.**

| S/N | Peak Position | FWHM    | ln (1/Cos $\Theta$ ) | ln ( $\beta$ ) |
|-----|---------------|---------|----------------------|----------------|
| 1.  | 31.81895      | 0.50573 | 0.039056895          | -4.7299793     |
| 2.  | 34.48523      | 0.23702 | 0.045983041          | -5.4878377     |
| 3.  | 36.30731      | 0.44006 | 0.051057133          | -4.8690712     |
| 4.  | 47.59853      | 0.38707 | 0.088869636          | -4.9973767     |
| 5.  | 56.60698      | 0.6468  | 0.127323872          | -4.4839451     |
| 6.  | 62.92766      | 0.46564 | 0.159031089          | -4.8125694     |
| 7.  | 66.45195      | 0.50505 | 0.178509643          | -4.7313248     |
| 8.  | 68.00271      | 0.56582 | 0.187505754          | -4.6177062     |
| 9.  | 69.19232      | 0.67919 | 0.194587164          | -4.4350813     |
